# Supplementary figures and images for: Multiepitope Proteins for the Differential Detection of IgG Antibodies against RBD of the Spike Protein and Non-RBD Regions of SARS-CoV-2
Source: MDPI journal article supplement (doi:10.3390/vaccines9090986), 2021-09-03

**A**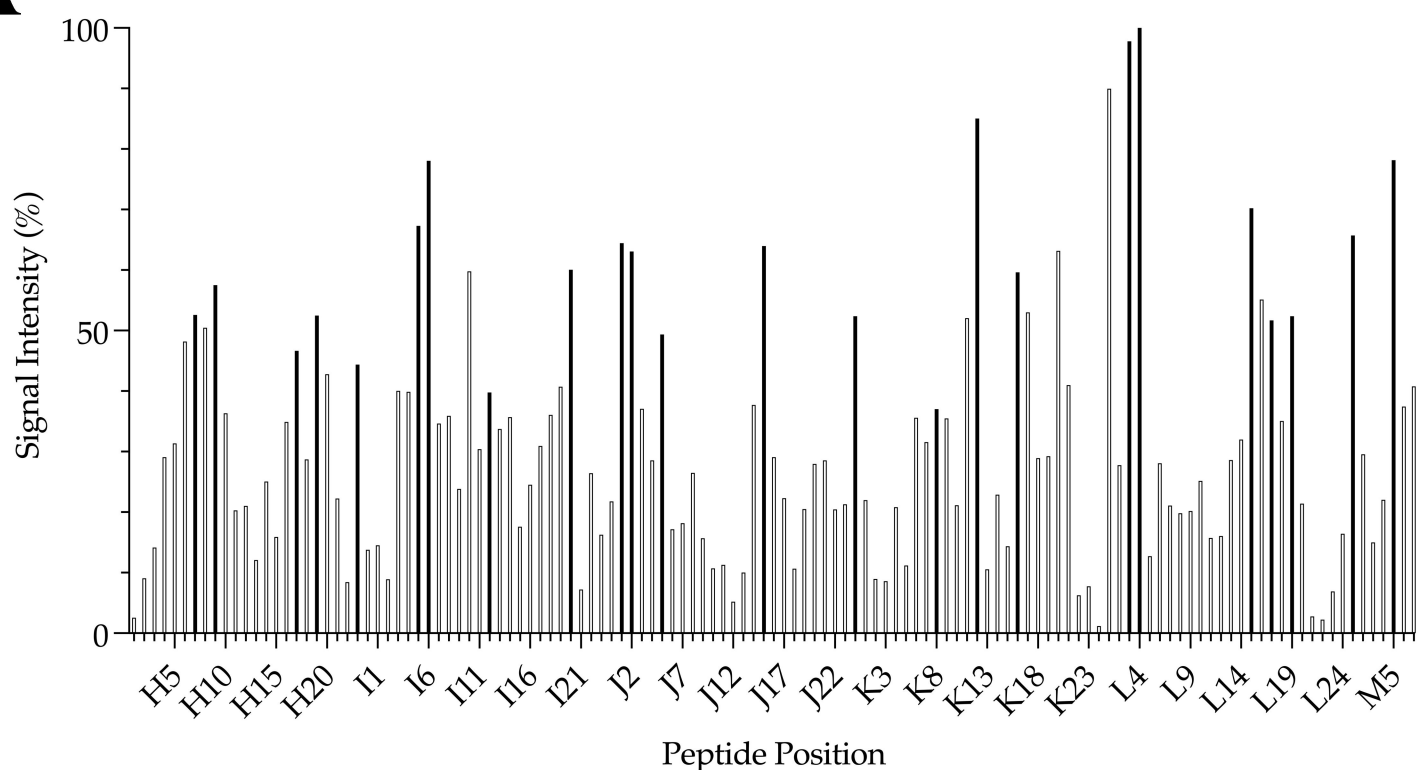**B**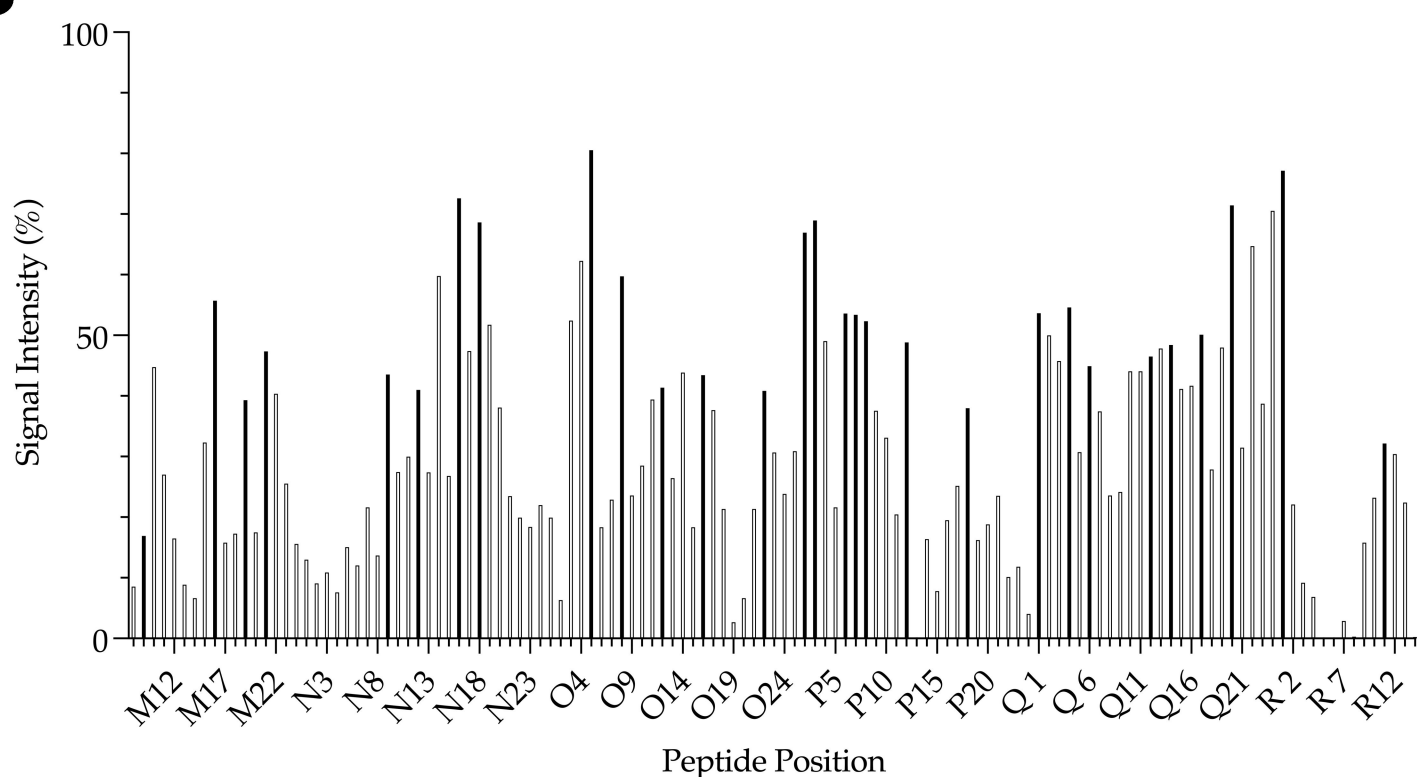**C**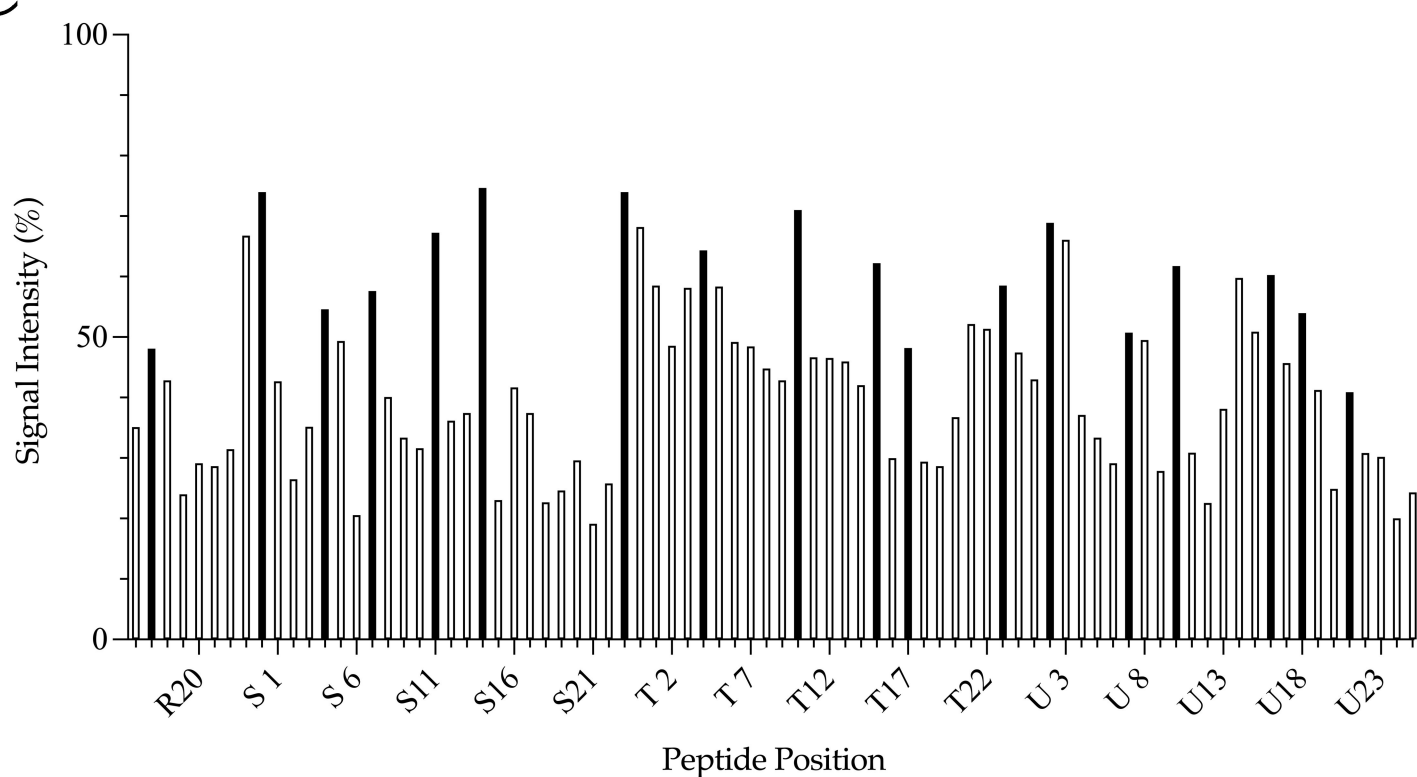**D**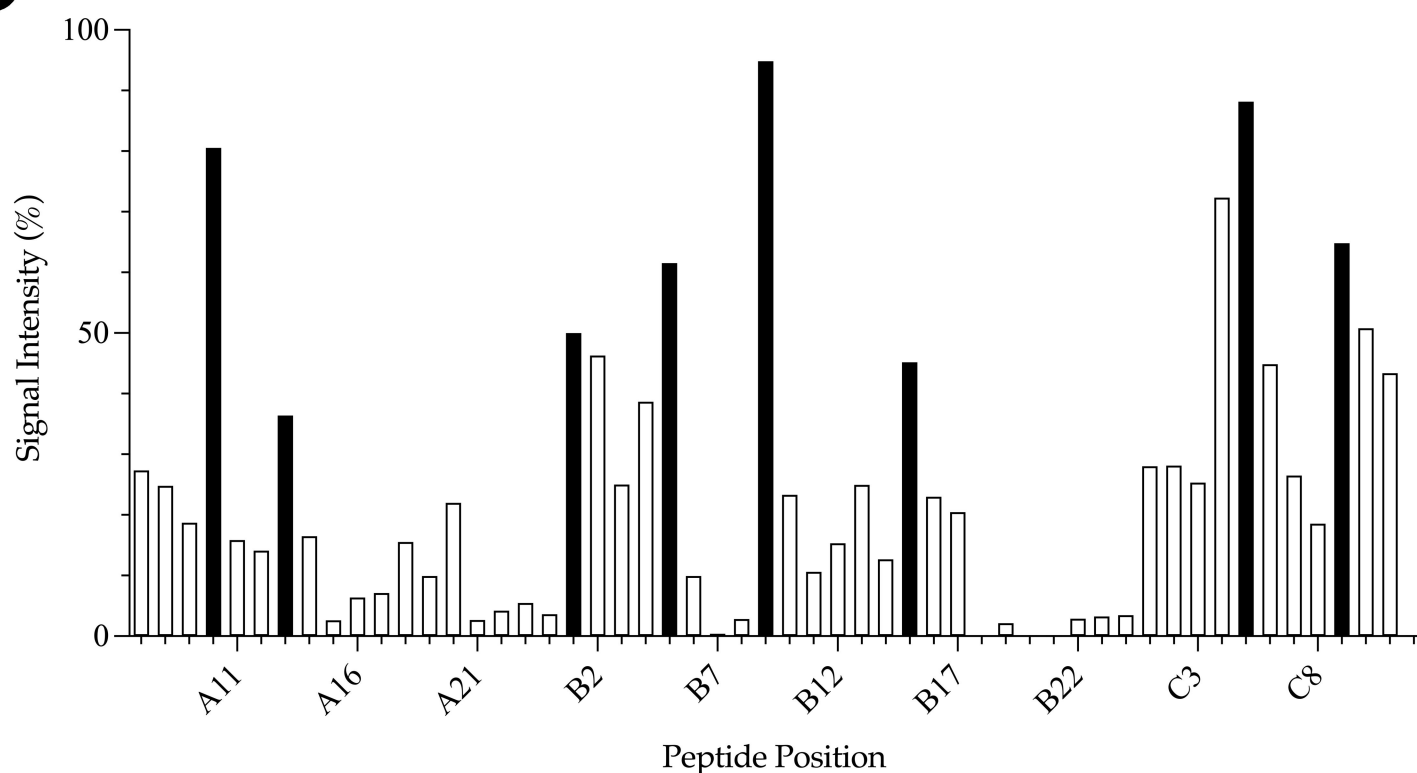

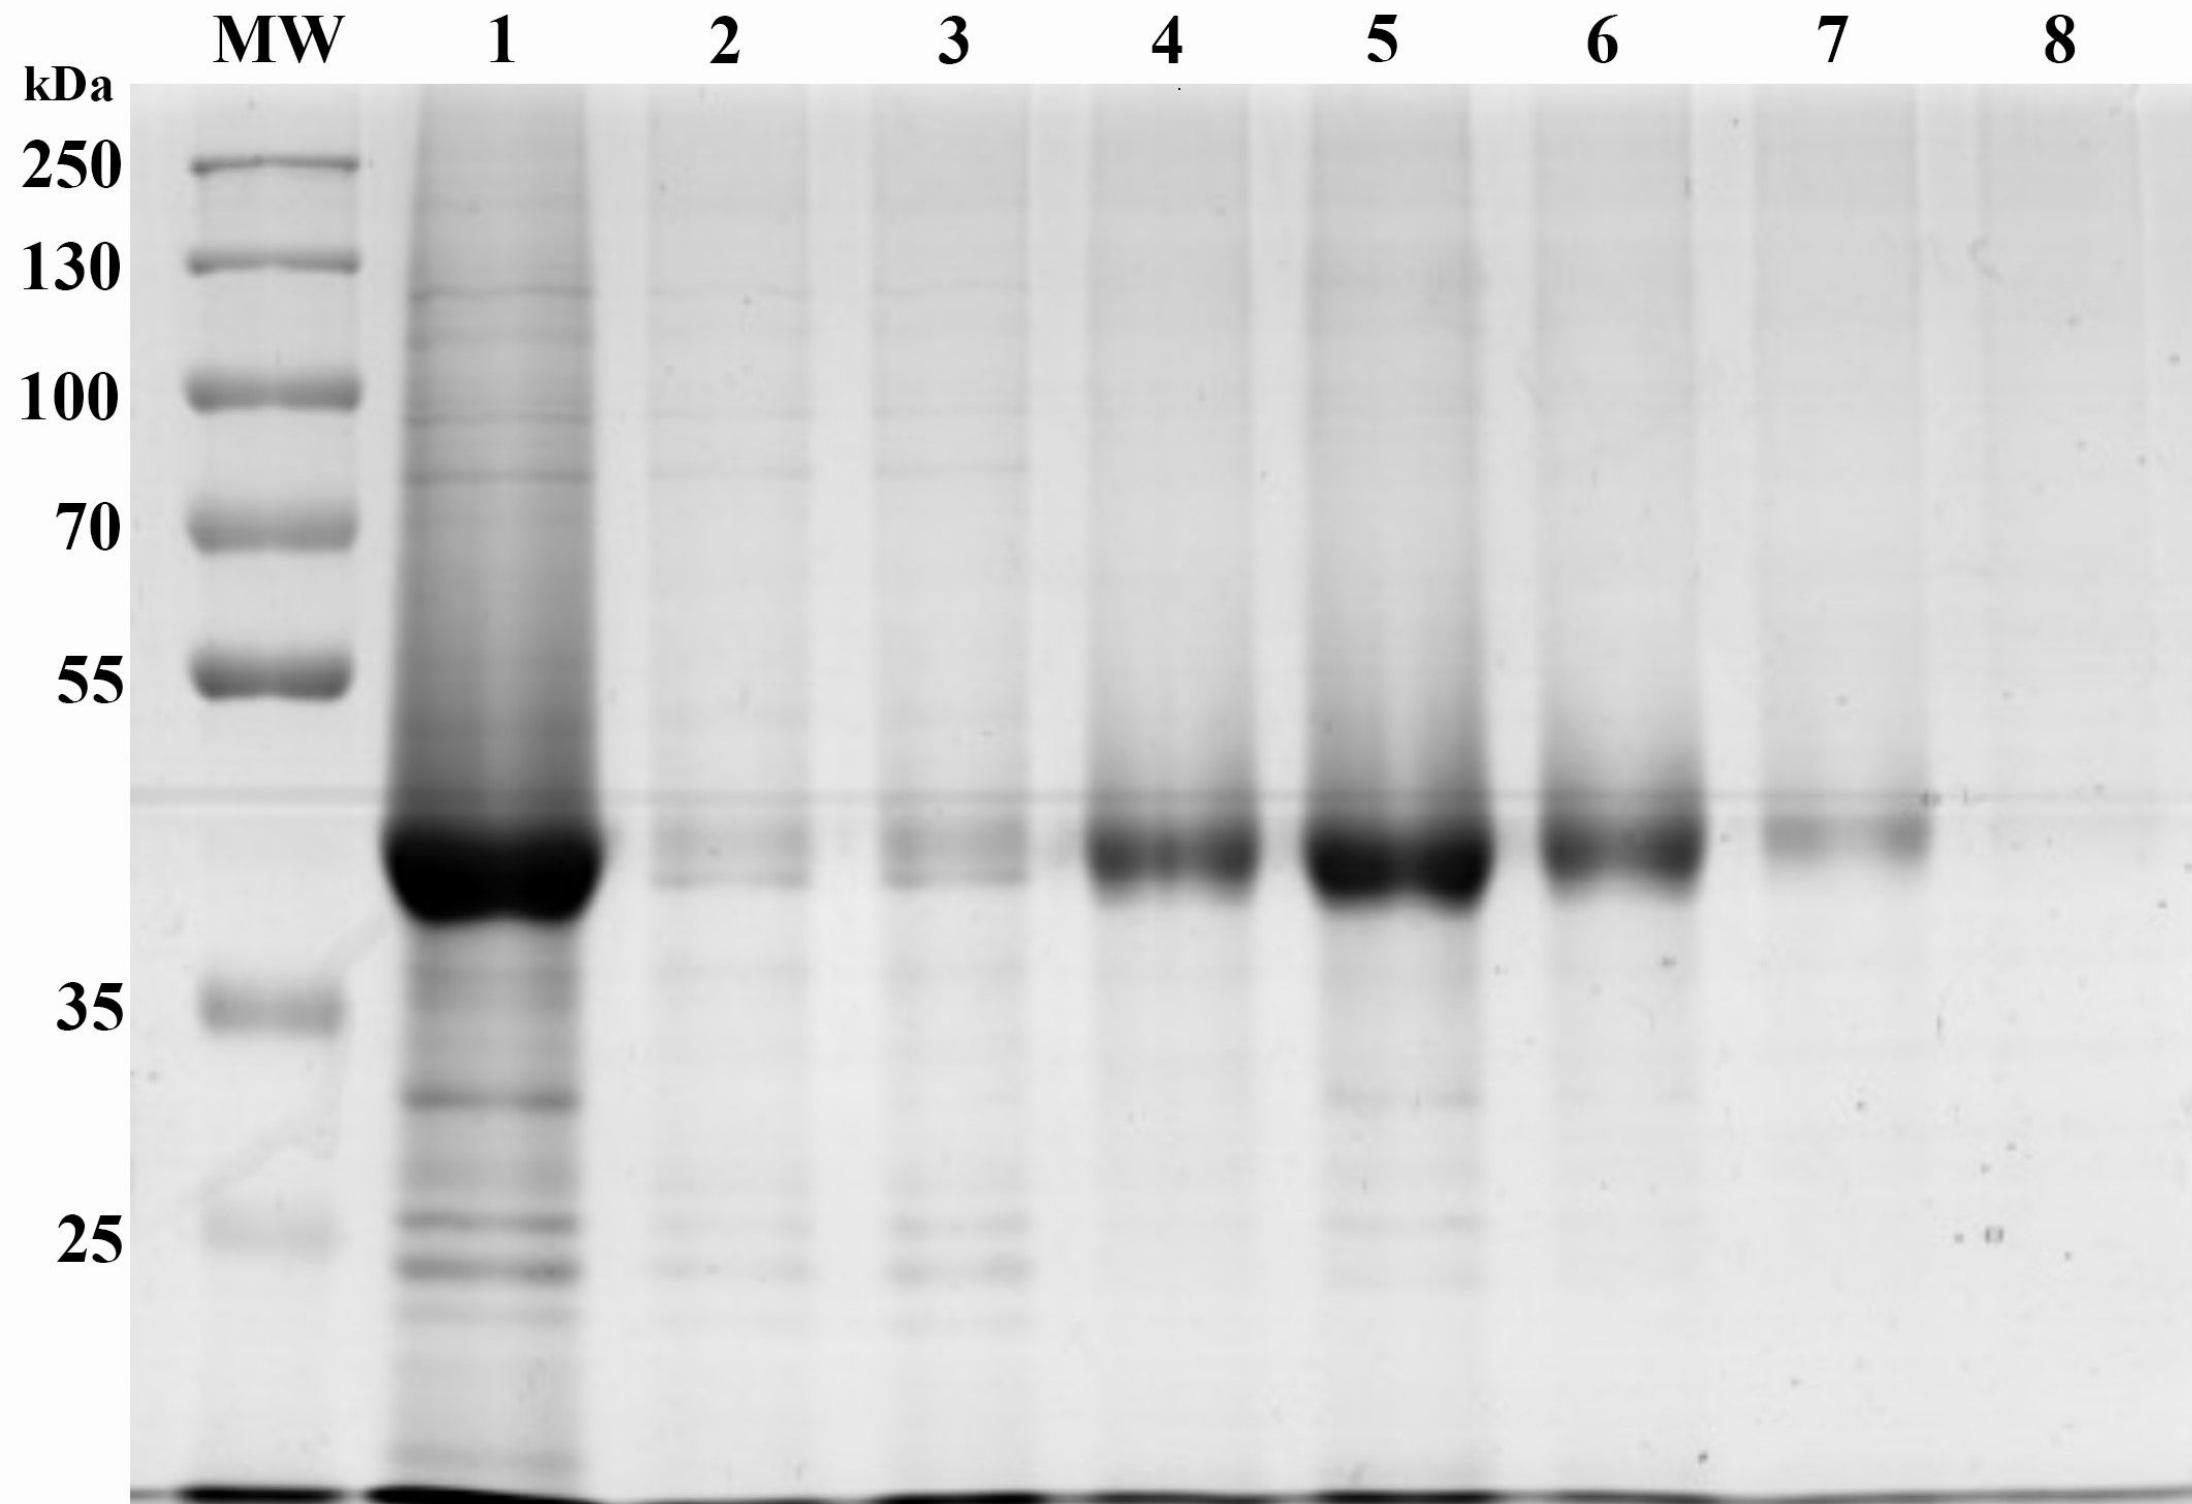

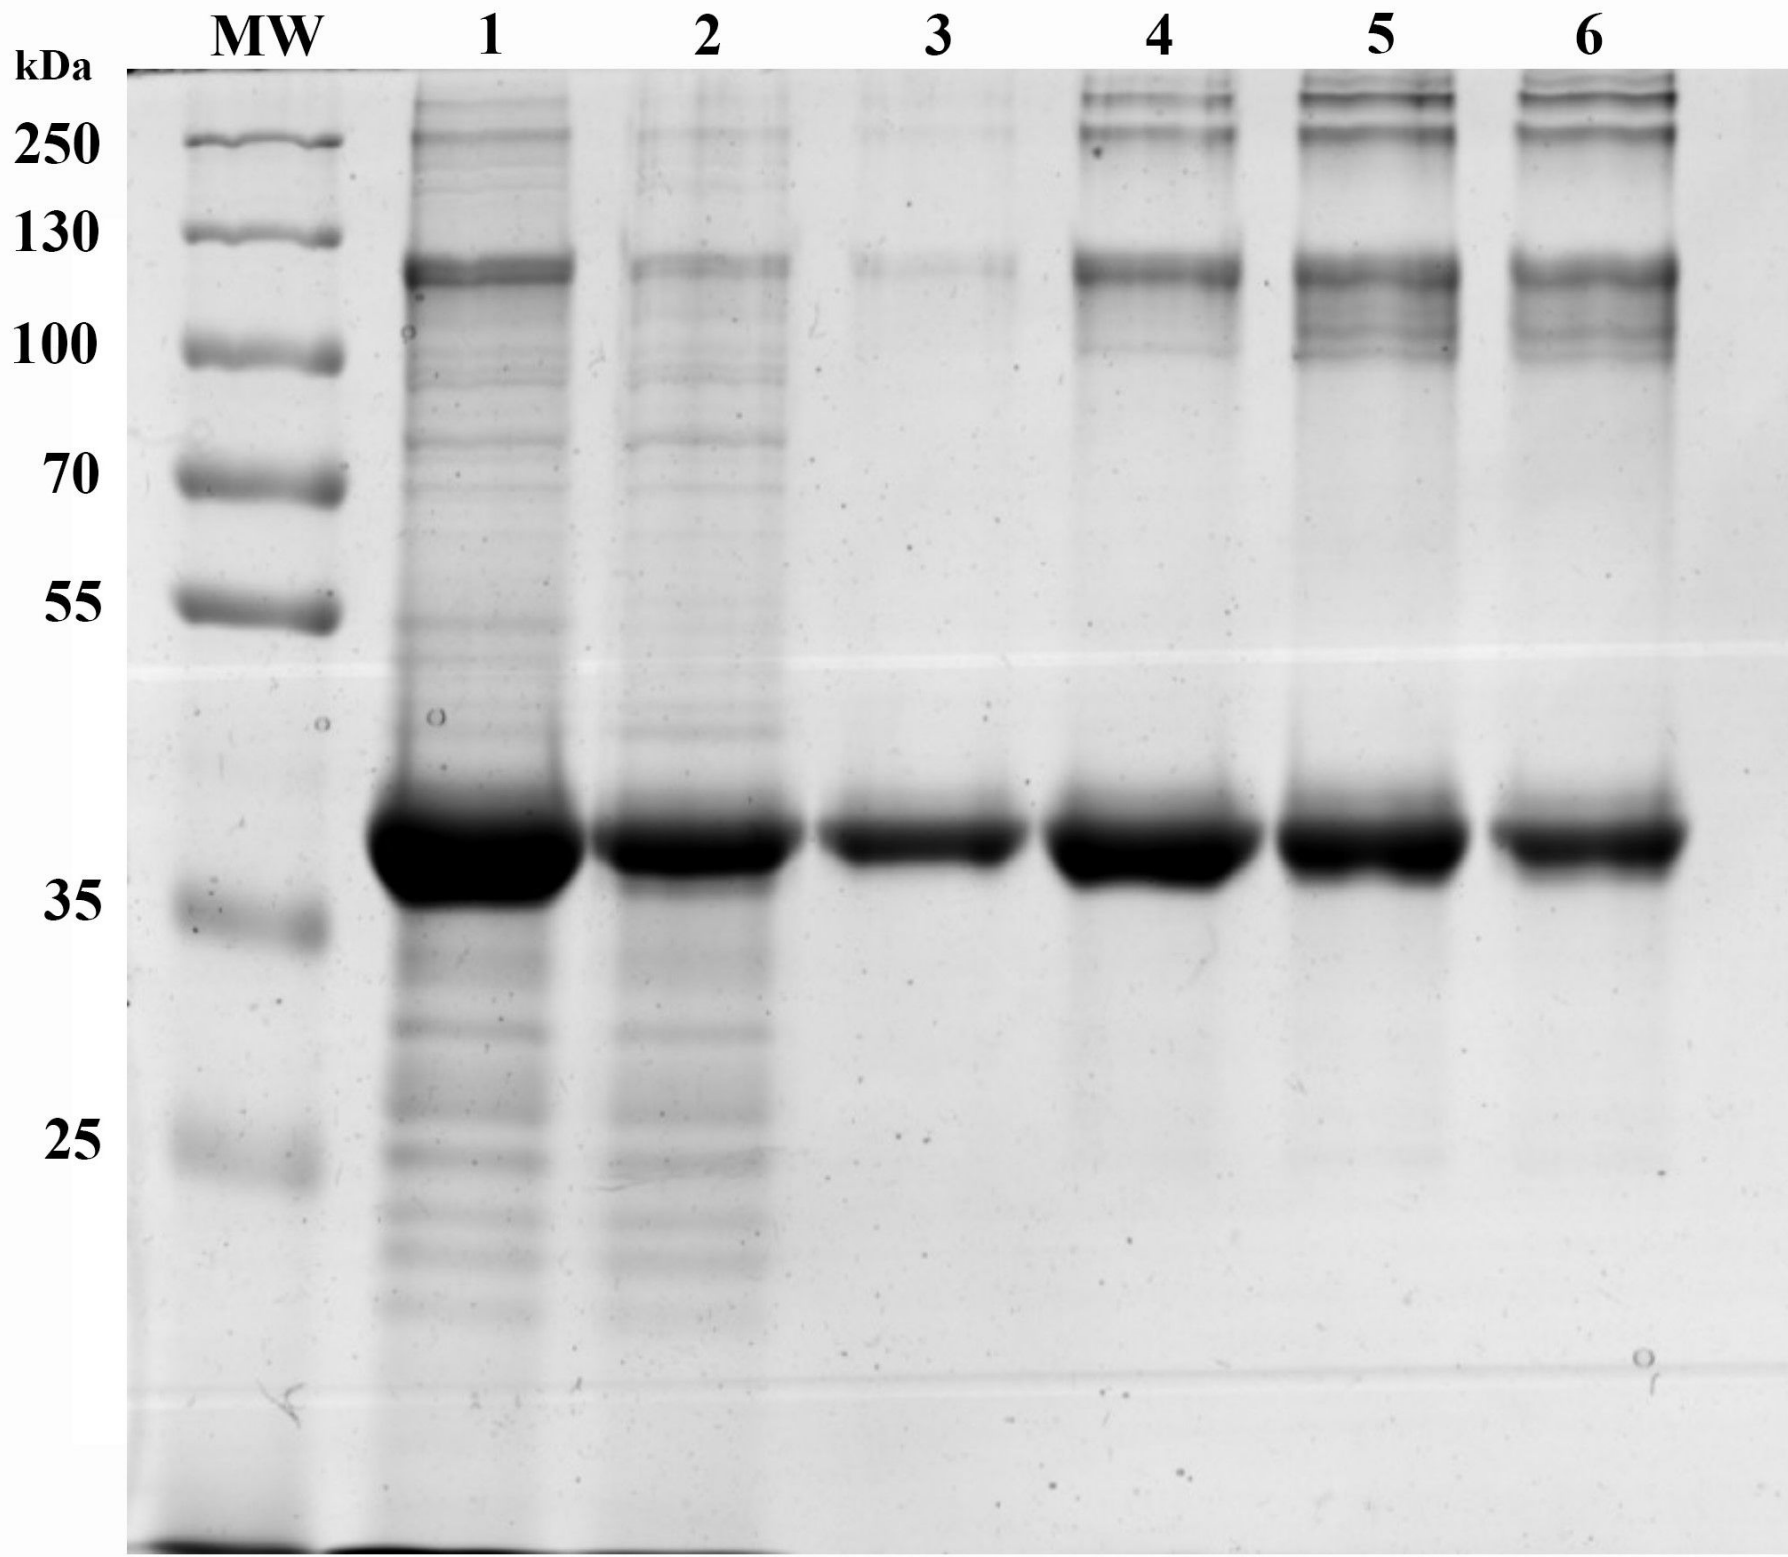

Supplement: s1 [file s1]
